# Supplementary material for: In situ growth of a tubular MoS2 membrane on a ceramic tube with improved organic solvent nanofiltration performance
Source: Royal Society of Chemistry journal article supplement (doi:10.1039/d1qm00104c), 2021-01-01
Supplement: d1qm00104c1.pdf [file d1qm00104c1.pdf]

## Supporting Information

### ***In-situ* Growth of Tubular MoS<sub>2</sub> Membrane on Ceramic Tube with Improved Organic Solvent Nanofiltration Performances**

Tongtong Liu<sup>a</sup>, Zhenping Qin<sup>a</sup>, Qiaohong Liu<sup>a,\*</sup>, Xuejian Li<sup>b</sup>, Yue Liu<sup>a</sup>, Quan-Fu An<sup>a</sup>,  
Hongxia Guo<sup>b,\*</sup>

*<sup>a</sup>Beijing Key Laboratory for Green Catalysis and Separation, Department of  
Environmental and Chemical Engineering, Beijing University of Technology, 100124  
Beijing, P. R. China*

*<sup>b</sup>Key Laboratory of Advanced Functional Materials of the Ministry of Education,  
College of Materials Science and Engineering, Beijing University of Technology,  
100124 Beijing, P. R. China*

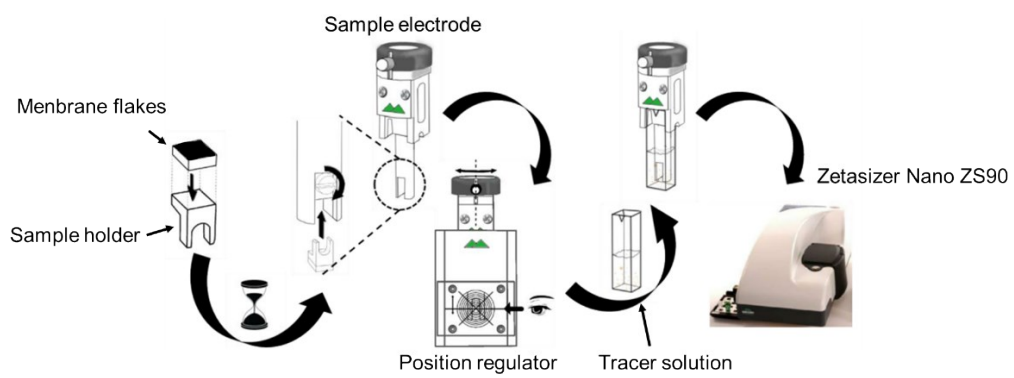

**Figure S1.** Schematic diagram of Zeta potential test on tubular membrane surface (pH of tracer solution is 7).

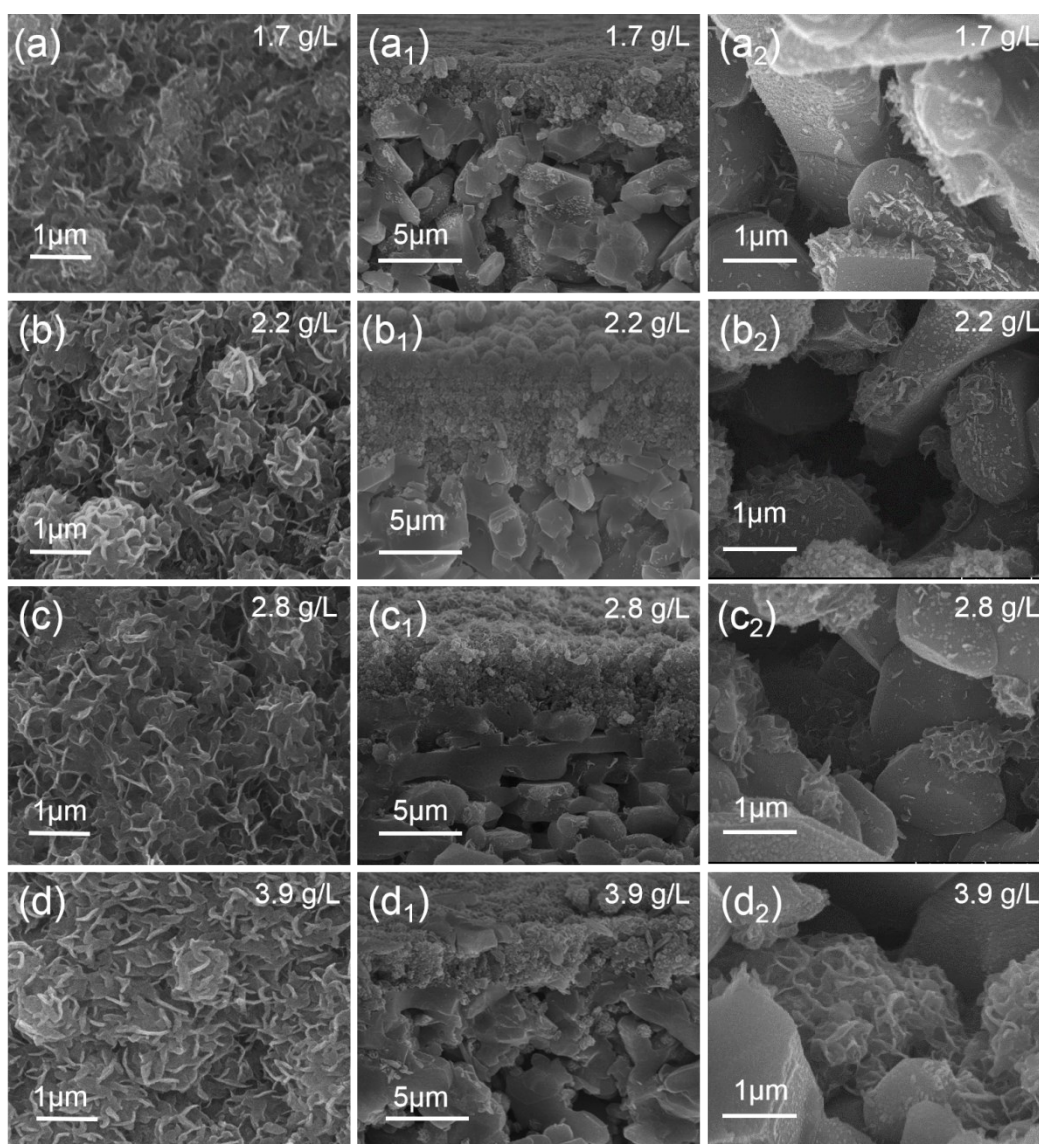

**Figure S2.** (a-d): SEM images of MoS<sub>2</sub> tubular ceramic membranes obtained with varying precursor solution from 1.7 g·L<sup>-1</sup> to 3.9 g·L<sup>-1</sup>; (a<sub>1</sub>-d<sub>1</sub>): cross-sectional SEM image of MoS<sub>2</sub> tubular ceramic membranes with varying precursor solution, (a<sub>2</sub>-d<sub>2</sub>) indicated the amplified view of a<sub>1</sub>-d<sub>1</sub> correspondently.

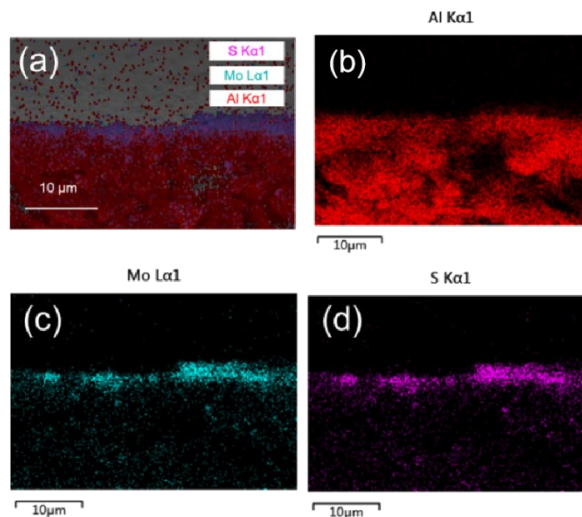

**Figure S3.** Energy Dispersive Spectrometer (EDS) analyses on the cross-section of the MoS<sub>2</sub> tubular ceramic membrane.

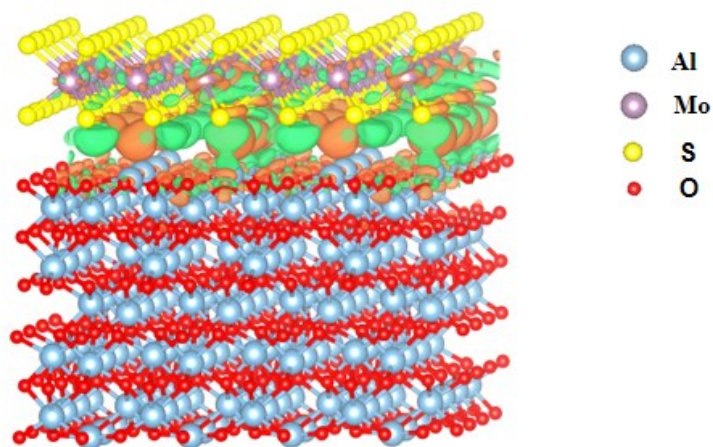

**Figure S4.** Deformation electron density, as the electron density difference between non-interacting and interacting systems, indicated the charge transfer process between MoS<sub>2</sub> layer and Al<sub>2</sub>O<sub>3</sub> substrate using density functional theory.

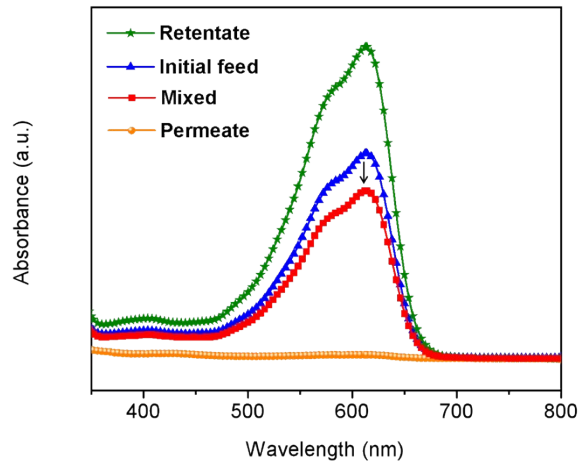

**Figure S5.** Dynamic adsorption experiment of MoS<sub>2</sub> tubular ceramic membrane (EB-MeOH concentration of initial feed: 0.01 g·L<sup>-1</sup>; Operating pressure: 0.2 MPa. Mixed: the mixture of permeate and retention solution after the membrane runs stably in EB-MeOH)

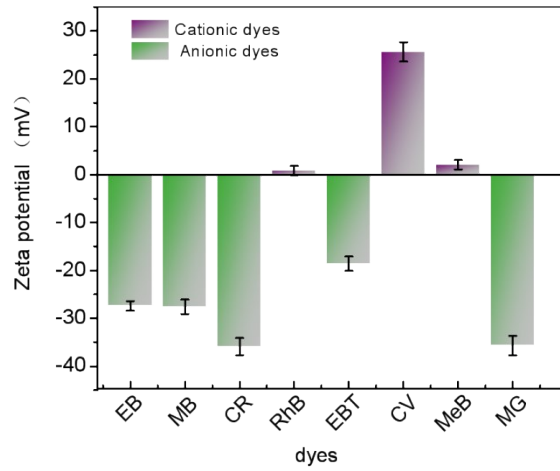

**Figure S6.** Zeta potential of different dyes in MeOH (Concentration: 0.1 g L<sup>-1</sup>, pH=6).

**Table S1.** Comparison of the separation performance of the MoS<sub>2</sub> tubular ceramic membrane *versus* other reported membranes in methanol media.

| Membrane                                        | Dyes           | Molecular weight<br>(g mol <sup>-1</sup> ) | Charge | Rejection (%) | Flux<br>(L m <sup>-2</sup> h <sup>-1</sup> MPa <sup>-1</sup> ) | Reference |
|-------------------------------------------------|----------------|--------------------------------------------|--------|---------------|----------------------------------------------------------------|-----------|
| MoS <sub>2</sub>                                | Evans blue     | 960.8                                      | -      | 98.1          | 403.1                                                          | This work |
| ZIF-8@GO/PEI                                    | Methyl blue    | 799.8                                      | -      | 99            | 61                                                             | [1]       |
| MPD-TMC (0.4% NaOH)<br>(with DMF mortification) | Acid fuchsin   | 585.5                                      | -      | 90.2          | 263                                                            | [2]       |
| MPD-TMC(without activation)                     | Methyl orange  | 327.33                                     | +      | 98.9          | 137.3 <sup>a</sup>                                             | [3]       |
| PAR-BHPF/PI                                     | Rose bengal    | 1017.6                                     | -      | 99            | 80                                                             | [4]       |
| Cyclodextrins-terephthaloyl chloride            | Methyl orange  | 327.3                                      | +      | 91            | 94                                                             | [5]       |
| PPSU                                            | Rose Bengal    | 1017.6                                     | -      | 66            | 18                                                             | [6]       |
| Highly-laminated GO                             | Methylene Blue | 319.9                                      | +      | 99.9          | 90 <sup>a</sup>                                                | [7]       |
| PBI/HPBI                                        | Methylene blue | 319.9                                      | +      | 99.2          | 26                                                             | [8]       |
| TETA-TFN                                        | Crystal violet | 408.0                                      | -      | 92            | 278                                                            | [9]       |
| rGO- TMPyP1.3                                   | Evans blue     | 960.8                                      | -      | 93            | 130                                                            | [10]      |
| HLGO                                            | Brilliant blue | 826                                        | -      | ~100          | 75                                                             | [7]       |
| Porphyrin/MPD                                   | Brilliant blue | 826                                        | -      | 59            | 325                                                            | [11]      |

|       |              |       |   |      |     |      |
|-------|--------------|-------|---|------|-----|------|
| GO/BA | Acid fuchsin | 585.5 | ■ | 95   | 35  | [12] |
| S-rGO | Acid fuchsin | 585.5 | ■ | 70.1 | 780 | [13] |

<sup>a</sup> The MeOH permeance data were obtained from pure MeOH rather than the separation of dyes-MeOH mixtures.

## References

- [1] H. Yang, N. Wang, L. Wang, H.X. Liu, Q.F. An, S. Ji, Vacuum-Assisted Assembly of ZIF-8@GO Composite Membranes on Ceramic Tube with Enhanced Organic Solvent Nanofiltration Performance, *J. Membr. Sci.* 2018, **545**, 158-166.
- [2] L. Xia, J. Ren, M. Weyd, J.R. McCutcheon, Ceramic-Supported Thin Film Composite Membrane for Organic Solvent Nanofiltration, *J. Membr. Sci.* 2018, **563**, 857-863.
- [3] S. Karan, Z. Jiang, A.G. Livingston, Sub-10nm Polyamide Nanofilms with Ultrafast Solvent Transport for Molecular Separation, *Science* 2015, **348**, 1347-1351.
- [4] M.F. Jimenez-Solomon, Q. Song, K.E. Jelfs, M. Munoz-Ibanez, A.G. Livingston, Polymer Nanofilms with Enhanced Microporosity by Interfacial Polymerization, *Nat. Mater.* 2016, **15**, 760-767.
- [5] L.F. Villalobos, T. Huang, K.V. Peinemann, Cyclodextrin Films with Fast Solvent Transport and Shape-Selective Permeability, *Adv. Mater.* 2017, **29**, 1606641.
- [6] S. Darvishmanesh, J.C. Jansen, F. Tasselli, E. Tocci, P. Luis, J. Degreève, E. Drioli, B. Van der Bruggen, Novel Polyphenylsulfone Membrane for Potential Use in Solvent Nanofiltration, *J. Membr. Sci.* 2011, **379**, 60-68.
- [7] Q. Yang, Y. Su, C. Chi, C.T. Cherian, K. Huang, V.G. Kravets, F.C. Wang, J.C. Zhang, A. Pratt, A.N. Grigorenko, Ultrathin Graphene-Based Membrane with Precise Molecular Sieving and Ultrafast Solvent Permeation, *Nat. Mater.* 2017, **16**, 1198-1202.
- [8] L. Shao, X. Cheng, Z. Wang, J. Ma, Z. Guo, Tuning the Performance of Polypyrrole-Based Solvent-Resistant Composite Nanofiltration Membranes by Optimizing Polymerization Conditions and Incorporating Graphene Oxide, *J. Membr. Sci.* 2014, **452**, 82-89.
- [9] I. Soroko, A. Livingston, Impact of TiO<sub>2</sub> Nanoparticles on Morphology and Performance of Crosslinked Polyimide Organic Solvent Nanofiltration (OSN) Membranes, *J. Membr. Sci.* 2009, **343**, 189-198.

- [10] T. Gao, L. Huang, C. Li, G. Xu, G. Shi, Graphene Membranes with Tuneable Nanochannels by Intercalating Self-Assembled Porphyrin Molecules for Organic Solvent Nanofiltration, *Carbon*, 2017, **124**, 263-270.
- [11] P.H.H. Duong, D.H. Anjum, K.-V. Peinemann, S.P. Nunes, Thin Porphyrin Composite Membranes with Enhanced Organic Solvent Transport, *J. Membr. Sci.* 2018, **563**, 684-693.
- [12] T. Gao, H. Wu, L. Tao, L. Qu, C. Li, Enhanced Stability and Separation Efficiency of Graphene Oxide Membranes in Organic Solvent Nanofiltration, *J. Mater. Chem. A* 2018, **6**, 19563-19569.
- [13] L. Huang, J. Chen, T. Gao, M. Zhang, Y. Li, L. Dai, L. Qu, G. Shi, Reduced Graphene Oxide Membranes for Ultrafast Organic Solvent Nanofiltration, *Adv. Mater.* 2016, **28**, 8669-8674.
